# Supplementary material for: Environmental fate of the anti-parasitic ivermectin in an aquatic micro-ecological system after a single oral administration
Source: PeerJ. 2019 Oct 9;7:e7805. doi: 10.7717/peerj.7805 (PMC6790101; doi:10.7717/peerj.7805)
Supplement: File S1 — Each data point indicates the average performance of 9 runs. [file peerj-07-7805-s001.xlsx]

## Sheet: Sheet1
		IVM concentrations in the water	IVM concentrations in the sediment	IVM concentrations in the visceral mass and muscle of brocarded carp (visceral mass)	IVM concentrations in the visceral mass and muscle of brocarded carp (muscle)	IVM concentrations in the Amazon sword plant (leaves)	IVM concentrations in the Amazon sword plant (roots)	IVM concentrations in the mudsnails
	0.5	0.091619	3.14095	8.61246	6.41545	19.5735	33.0574	13.2208
	1	0.084	2.95048	149.268	67.0798	20.8234	26.1183	16.241
	7	0.113048	3.1981	68.6797	23.5672	14.3969	38.5845	24.9873
	15	0.10781	3.25762	11.117	15.0372	18.5809	28.6218	13.4408
	30	0.115429	3.86238	28.9792	9.60592	15.1729	27.1187	16.6286
	45	0.0906667	3.56476	27.7962	4.90479	15.8514	26.3244	14.0707
	60	0.0801905	3.33381	9.46502	8.49576	18.0735	29.1251	14.0536
	70	0.076381	2.94571	6.68318	4.468	14.04	21.1395	13.9543
raw data		IVM concentrations in the water	IVM concentrations in the sediment	IVM concentrations in the visceral mass and muscle of brocarded carp (visceral mass)	IVM concentrations in the visceral mass and muscle of brocarded carp (muscle)	IVM concentrations in the Amazon sword plant (leaves)	IVM concentrations in the Amazon sword plant (roots)	IVM concentrations in the mudsnails
0.5h	A1	0.0934472	3.37625	9.03237	6.48379	17.3436	30.1947	12.3783
	A2	0.0922874	3.57904	8.09632	6.04488	16.2465	29.3859	12.3645
	A3	0.0890065	3.01135	8.23975	6.63648	15.4726	35.4757	14.4757
	B1	0.0902863	2.96984	8.93743	5.92878	20.3948	33.4759	15.4758
	B2	0.0909827	3.11294	8.44829	6.37386	20.3747	36.4737	12.3769
	B3	0.0922761	3.18295	9.04727	6.57567	23.4759	34.4759	11.2747
	C1	0.0916342	2.98343	8.83748	6.33493	21.3848	31.2749	14.479
	C2	0.0917746	3.03037	8.38628	6.87493	21.2748	32.3848	12.9385
	C3	0.0928763	3.0224	8.48698	6.48572	20.1935	34.3749	13.2237
1d	A1	0.0825761	2.77427	132.838	65.8948	17.3749	23.0038	14.5488
	A2	0.0837152	2.87896	157.857	67.9851	18.1949	24.3248	16.2777
	A3	0.0850731	2.89317	152.837	69.5129	23.0949	26.2918	15.4637
	B1	0.083721	3.13837	147.372	63.3961	23.3949	30.4765	18.3648
	B2	0.0846251	2.99847	150.293	70.5738	21.2837	29.3749	13.4758
	B3	0.0837322	2.88736	156.993	64.5868	19.2778	24.3651	15.3874
	C1	0.0840172	3.00468	152.375	68.7797	23.1924	27.4739	17.2634
	C2	0.0832328	3.0285	144.375	61.4049	19.204	22.375	18.3848
	C3	0.0853072	2.95049	148.473	71.5838	22.3928	27.3787	17.0028
7d	A1	0.113439	3.44357	63.6867	19.4884	12.3747	35.6387	23.8385
	A2	0.114572	3.15456	66.4285	20.3747	11.6747	35.1046	22.9847
	A3	0.111676	3.37648	70.4068	26.3617	15.4672	40.3911	27.1056
	B1	0.112365	3.11848	72.3848	25.3643	15.4637	32.3848	25.4638
	B2	0.112784	3.39875	67.3858	23.4786	13.3547	44.3837	24.3647
	B3	0.113762	3.0388	68.4758	27.3746	14.3776	40.3847	21.5207
	C1	0.112816	2.98755	70.3857	21.7463	16.2884	39.2949	26.5739
	C2	0.112733	3.15849	69.4869	24.4593	17.2836	40.3928	27.5746
	C3	0.113282	3.10619	69.4758	23.4566	13.2871	39.2848	25.4591
15d	A1	0.108123	3.33759	10.2784	12.3759	18.2838	30.0848	11.2736
	A2	0.107263	3.28579	10.3848	11.3637	19.5837	28.3848	14.2846
	A3	0.107038	3.28765	11.3049	14.478	19.3737	26.3848	13.4039
	B1	0.107876	3.56892	11.0861	17.2664	16.3044	26.3896	14.6801
	B2	0.108138	2.97465	12.3848	15.3488	17.2737	29.205	12.388
	B3	0.10875	3.37648	9.78856	18.4858	20.2939	29.3806	12.3649
	C1	0.10736	3.09478	10.2739	16.2638	19.9031	29.3885	15.4857
	C2	0.107683	3.08595	11.2761	16.3736	19.2838	29.184	13.476
	C3	0.108056	3.30677	13.2758	13.3788	16.9284	29.1943	13.6104
30d	A1	0.116239	4.00398	26.2838	9.72648	12.3746	24.1837	14.2284
	A2	0.116798	3.88466	32.4851	9.23238	14.2827	29.2547	13.4777
	A3	0.115252	3.83497	30.3855	10.0186	13.3546	26.0887	18.3886
	B1	0.113729	3.99856	28.4847	9.88472	18.3523	26.3857	17.3664
	B2	0.115178	3.62749	29.3247	9.48375	17.284	28.4208	18.2848
	B3	0.114538	3.77483	26.4857	9.67836	14.5759	29.3838	17.4737
	C1	0.117283	3.69477	27.3749	8.95343	16.2736	25.4858	15.4873
	C2	0.114207	3.87846	31.494	9.78726	14.5844	25.4759	16.4766
	C3	0.115634	4.06373	28.4947	9.68837	15.4737	29.3887	18.4737
45d	A1	0.0888872	3.87493	27.374	4.30928	15.7632	23.3868	14.2776
	A2	0.0912875	3.36896	25.4839	4.27385	18.1738	27.5956	14.6156
	A3	0.0923135	3.67677	29.3477	5.04983	16.3738	25.4745	13.4486
	B1	0.0894765	3.37873	28.3848	5.43796	19.1948	28.3985	16.2792
	B2	0.0894798	3.66471	25.4859	4.63744	13.4716	26.3746	17.2555
	B3	0.0913815	3.74288	28.7849	5.27386	15.3685	25.3648	13.4474
	C1	0.0928287	3.64777	29.2848	5.03947	12.3773	27.3648	12.0398
	C2	0.088571	3.26048	25.523	4.83766	14.4759	27.3747	13.2638
	C3	0.0917742	3.46763	30.4967	5.28375	17.4638	25.5849	12.0093
60d	A1	0.0813987	3.67668	10.2739	8.93785	13.8089	28.0587	14.9539
	A2	0.0831428	3.03036	10.3749	8.79773	14.3597	25.8759	12.0125
	A3	0.0787259	3.33798	8.77494	8.27465	17.2855	26.3638	12.3783
	B1	0.0766837	2.89746	10.3749	8.48353	14.3749	24.035	14.5768
	B2	0.0819564	3.62765	8.67383	8.02837	20.3948	31.8095	17.2738
	B3	0.0803613	3.56827	9.49584	8.98375	21.3746	33.7557	16.4857
	C1	0.0796854	3.57247	9.95814	8.37468	17.3748	30.3928	13.2859
	C2	0.0818763	3.30949	8.68487	8.29385	21.2937	33.4849	12.3857
	C3	0.0778838	2.98395	8.57398	8.28748	22.3949	28.3499	13.1295
70d	A1	0.0782975	2.46689	6.85846	4.19487	14.0395	22.3764	11.2309
	A2	0.0756285	2.87454	6.54947	4.39485	11.4749	21.2738	12.604
	A3	0.0729836	3.27366	8.78885	4.61746	11.5547	24.3647	13.2705
	B1	0.0757347	3.01174	6.02489	4.83446	14.4388	22.4647	16.474
	B2	0.077284	2.73847	5.98609	4.73756	16.4735	19.4536	15.471
	B3	0.0783677	3.4763	6.48592	4.43754	11.2736	19.2798	14.5847
	C1	0.0766565	2.87463	6.28495	4.03847	13.3847	20.3036	13.9228
	C2	0.0748377	3.04783	5.48593	4.11935	17.2465	20.8732	14.0329
	C3	0.0776385	2.74738	7.68403	4.83747	16.4738	19.8656	13.9982
